# Supplementary material for: Exploring the Value of Real-Time Medication Adherence Monitoring: A Qualitative Study
Source: MDPI journal article supplement (doi:10.3390/pharmacy11010018), 2023-01-18
Supplement: s1 [file s1]

### COREQ (Consolidated criteria for REporting Qualitative research) Checklist

A checklist of items that should be included in reports of qualitative research. You must report the page number in your manuscript where you consider each of the items listed in this checklist. If you have not included this information, either revise your manuscript accordingly before submitting or note N/A.

| Topic                                          | Item No. | Guide Questions/Description                                                                                                                              | Reported on Page No. |
|------------------------------------------------|----------|----------------------------------------------------------------------------------------------------------------------------------------------------------|----------------------|
| <b>Domain 1: Research team and reflexivity</b> |          |                                                                                                                                                          |                      |
| <i>Personal characteristics</i>                |          |                                                                                                                                                          |                      |
| Interviewer/facilitator                        | 1        | Which author/s conducted the interview or focus group?                                                                                                   | 9                    |
| Credentials                                    | 2        | What were the researcher's credentials? E.g. PhD, MD                                                                                                     | NA                   |
| Occupation                                     | 3        | What was their occupation at the time of the study?                                                                                                      | NA                   |
| Gender                                         | 4        | Was the researcher male or female?                                                                                                                       | Females- NR          |
| Experience and training                        | 5        | What experience or training did the researcher have?                                                                                                     | NA                   |
| <i>Relationship with participants</i>          |          |                                                                                                                                                          |                      |
| Relationship established                       | 6        | Was a relationship established prior to study commencement?                                                                                              | NA                   |
| Participant knowledge of the interviewer       | 7        | What did the participants know about the researcher? e.g. personal goals, reasons for doing the research                                                 | NA                   |
| Interviewer characteristics                    | 8        | What characteristics were reported about the inter viewer/facilitator? e.g. Bias, assumptions, reasons and interests in the research topic               | NA                   |
| <b>Domain 2: Study design</b>                  |          |                                                                                                                                                          |                      |
| <i>Theoretical framework</i>                   |          |                                                                                                                                                          |                      |
| Methodological orientation and Theory          | 9        | What methodological orientation was stated to underpin the study? e.g. grounded theory, discourse analysis, ethnography, phenomenology, content analysis | 7                    |
| <i>Participant selection</i>                   |          |                                                                                                                                                          |                      |
| Sampling                                       | 10       | How were participants selected? e.g. purposive, convenience, consecutive, snowball                                                                       | 8                    |
| Method of approach                             | 11       | How were participants approached? e.g. face-to-face, telephone, mail, email                                                                              | 8-9                  |
| Sample size                                    | 12       | How many participants were in the study?                                                                                                                 | 10                   |
| Non-participation                              | 13       | How many people refused to participate or dropped out? Reasons?                                                                                          | 10                   |
| <i>Setting</i>                                 |          |                                                                                                                                                          |                      |
| Setting of data collection                     | 14       | Where was the data collected? e.g. home, clinic, workplace                                                                                               | 9                    |
| Presence of non-participants                   | 15       | Was anyone else present besides the participants and researchers?                                                                                        | 9                    |
| Description of sample                          | 16       | What are the important characteristics of the sample? e.g. demographic data, date                                                                        | 10                   |
| <i>Data collection</i>                         |          |                                                                                                                                                          |                      |
| Interview guide                                | 17       | Were questions, prompts, guides provided by the authors? Was it pilot tested?                                                                            | 9                    |
| Repeat interviews                              | 18       | Were repeat inter views carried out? If yes, how many?                                                                                                   | NA                   |
| Audio/visual recording                         | 19       | Did the research use audio or visual recording to collect the data?                                                                                      | 9                    |
| Field notes                                    | 20       | Were field notes made during and/or after the inter view or focus group?                                                                                 | NA                   |
| Duration                                       | 21       | What was the duration of the inter views or focus group?                                                                                                 | 9                    |
| Data saturation                                | 22       | Was data saturation discussed?                                                                                                                           | NA                   |
| Transcripts returned                           | 23       | Were transcripts returned to participants for comment and/or                                                                                             | NA                   |

| Topic                                  | Item No. | Guide Questions/Description                                                                                                        | Reported on Page No. |
|----------------------------------------|----------|------------------------------------------------------------------------------------------------------------------------------------|----------------------|
|                                        |          | correction?                                                                                                                        |                      |
| <b>Domain 3: analysis and findings</b> |          |                                                                                                                                    |                      |
| <i>Data analysis</i>                   |          |                                                                                                                                    |                      |
| Number of data coders                  | 24       | How many data coders coded the data?                                                                                               | 9                    |
| Description of the coding tree         | 25       | Did authors provide a description of the coding tree?                                                                              | NA                   |
| Derivation of themes                   | 26       | Were themes identified in advance or derived from the data?                                                                        | 9                    |
| Software                               | 27       | What software, if applicable, was used to manage the data?                                                                         | 9                    |
| Participant checking                   | 28       | Did participants provide feedback on the findings?                                                                                 | NA                   |
| <i>Reporting</i>                       |          |                                                                                                                                    |                      |
| Quotations presented                   | 29       | Were participant quotations presented to illustrate the themes/findings?<br>Was each quotation identified? e.g. participant number | 11-23                |
| Data and findings consistent           | 30       | Was there consistency between the data presented and the findings?                                                                 | NA                   |
| Clarity of major themes                | 31       | Were major themes clearly presented in the findings?                                                                               | NA                   |
| Clarity of minor themes                | 32       | Is there a description of diverse cases or discussion of minor themes?                                                             | NA                   |

**Figure S1** COREQ (Consolidated Criteria for Reporting Qualitative research) Checklist.

**Table S1.** Interview Guide based on Schwartz's theory of values [25].

|                        |                                                                                           |                                                                                                                                                         |
|------------------------|-------------------------------------------------------------------------------------------|---------------------------------------------------------------------------------------------------------------------------------------------------------|
| Background information | Can you tell us a little about yourself?                                                  |                                                                                                                                                         |
| Views and knowledge    | What have you heard about products that can record and track real-time medication intake? |                                                                                                                                                         |
|                        | Tell us about the products that you have heard of                                         |                                                                                                                                                         |
|                        | What do you think about these products? And why do you think that?                        |                                                                                                                                                         |
| Values                 | <b>Definition</b>                                                                         | <b>Question</b>                                                                                                                                         |
| Self-direction         | Desire to be free from external control or constraints on one's thoughts or actions.      | Do you see yourself or your patients using these products?                                                                                              |
|                        |                                                                                           | When would you discourage/encourage the use of these products for yourself/your loved one/your patient/your insuree?                                    |
|                        |                                                                                           | What type of patient population would be suitable or not suitable for these products? Why or why not?                                                   |
|                        |                                                                                           | How do you see these products fitting into your/your patient's/your insuree's daily schedule?                                                           |
| Stimulation            | Seeking arousal by participating in exciting, new, and challenging activities             | How would these products change the way you manage your or your patient's medication intake?                                                            |
|                        |                                                                                           | How do you think the feedback about such products will impact your ability to recommend/offer/cover these products to your patients and their families? |

|             |                                                                                       |                                                                                                                                                                                                                                                                                                                                                                                                                                                                                                               |
|-------------|---------------------------------------------------------------------------------------|---------------------------------------------------------------------------------------------------------------------------------------------------------------------------------------------------------------------------------------------------------------------------------------------------------------------------------------------------------------------------------------------------------------------------------------------------------------------------------------------------------------|
| Hedonism    | Pursuing pleasurable experiences, especially sensual gratification                    | <p>What are the features that you/your patient/your loved one/your insuree would like to see in such products or will make you want to use the product?</p> <p>How would you feel about working more closely with your/your loved one's HCP about managing your/your loved one's medication intake?</p> <p>How would you feel about collaborating with other HCPs/CG/patients via the use of these products?</p>                                                                                              |
| Achievement | Wanting to be competent and to be recognized for one's accomplishments                | <p>How do you think these products will help you/your loved one/your patient to manage medications?</p> <p>How do you think these products will ultimately help manage your/their health?</p> <p>How do you think it will affect quality of life?</p>                                                                                                                                                                                                                                                         |
| Power       | Desire to exert control over people and resources                                     | <p>How do you think the use of these products will impact your/your loved one's/your patient/insuree's ability to be independent/autonomous of their medication intake?</p> <p>How do you think the availability of medication intake information and adherence impact your conversations with your physician/pharmacist/patient/insuree?</p> <p>What kind of return on investment/benefit do you think is possible if you bought/prescribed/insured this product for yourself/patient/loved one/insuree?</p> |
| Security    | Desire to avoid danger or instability                                                 | <p>How do you think the use of these products will impact your/your patient's safety related to medication intake?</p> <p>OR put them in danger?</p> <p>What do you think about the impact on privacy of with these products?</p>                                                                                                                                                                                                                                                                             |
| Conformity  | Need to avoid violations of social norms and expectations                             | <p>How would others around you feel/think about you using/recommending these products?</p> <p>What do you think your friends/family/colleagues/industry would say or think if they saw you use/prescribe/insure such products?</p>                                                                                                                                                                                                                                                                            |
| Tradition   | Accepting the established patterns of thought and behavior that reflect one's culture | <p>How would others around you/your patient/insuree feel/think about you using/recommending/insuring these products over standard interventions such as the traditional blister pack, Dossett box, etc.</p>                                                                                                                                                                                                                                                                                                   |

|              |                                                                                                              |                                                                                                                                                                                                                                                                                                  |
|--------------|--------------------------------------------------------------------------------------------------------------|--------------------------------------------------------------------------------------------------------------------------------------------------------------------------------------------------------------------------------------------------------------------------------------------------|
| Benevolence  | Desire to promote the welfare of people with whom one has frequent personal contact                          | <p>What kind of usefulness if any, do you see with these products for you or your patients'/insuree medication management process?</p> <p>How would these products impact your ability to care for your patient/loved one?</p> <p>What kind of issues do you anticipate with these products?</p> |
| Universalism | Desire to promote the welfare of all people (including strangers) and a concern for the protection of nature | <p>What would drive/encourage you to use/purchase/recommend/provide coverage for this technology to your own use/your patients/your clients?</p> <p>How do you think the use of these products will help collaboration with other professionals?</p>                                             |
